1  
2  
3  
4  
5  
6  
7  
8  
9  
10  
11  
12  
13  
14  
15  
16  
17  
18  
19  
20  
21  
22  
23  
24  
25  
26

# **Development of an extraction-free LAMP method for the generic detection of Orthopoxvirus and for the specific detection of Mpox virus**

**Zhiru Li<sup>1</sup>, Amit Sinha<sup>1</sup>, Yinhua Zhang<sup>1</sup>, Nathan Tanner<sup>1</sup>, Hui-Ting Cheng<sup>2</sup>, Prem Prensirut<sup>2</sup>, Clotilde K. S. Carlow<sup>1\*</sup>**

**<sup>1</sup>New England Biolabs, Ipswich, Massachusetts, 01938, USA**

**<sup>2</sup>Mirimus Inc. Brooklyn, New York, 11226, USA**

27 **Running Title:** Simple and rapid Orthopoxvirus and Mpox virus LAMP tests

28 **Keywords:** Orthopoxvirus, Monkeypox, Mpox virus, LAMP, Extraction free

29 **\*Corresponding author:** Clotilde Carlow, Division of Genome Biology, New England

30 Biolabs, Ipswich, MA 01938. Tel: 978 380 7263, Fax: 978 921 1350, e-mail:

31 [carlow@neb.com](mailto:carlow@neb.com).

32

## 33 **Abstract**

34 Mpox is a neglected zoonotic disease endemic in West and Central Africa. The 2022 Mpox  
35 outbreak with more than 18,000 cases worldwide generated great concern about future outbreaks  
36 and highlighted the need for a simple and rapid diagnostic test. The Mpox virus, MPXV, is a  
37 member of the Orthopoxvirus genus that also contains other pathogenic viruses including variola  
38 virus, vaccinia virus, camelpox virus, and cowpox virus. Phylogenomic analysis of all available  
39 Orthopoxvirus genomes identified 10 distinct phylogroups, with isolates from infected humans  
40 distributed across various phylogroups interspersed with isolates from animal sources, indicating  
41 the zoonotic potential of these viruses. In this study, we developed a simple and sensitive  
42 colorimetric pan-Orthopoxvirus LAMP assay for broader Orthopoxvirus detection. We also  
43 developed an MPXV-specific probe that differentiates MPXV from other Orthopoxviruses on the  
44 N1R gene which differs by only a few nucleotides. In addition, we described an extraction-free  
45 protocol for use directly with swab eluates in LAMP assays, thereby eliminating the time and  
46 resources needed to extract DNA from the sample. Our direct LAMP assays are well-suited for  
47 low-resource settings and provide a valuable tool for rapid and scalable diagnosis and  
48 surveillance of Orthopoxviruses and MPXV.

## 49 **Introduction**

50 Mpox (previously known as Monkeypox) was first described in 1958 in laboratory monkeys  
51 shipped from Singapore to Denmark [1]. The first Mpox case in humans was reported in 1970 in  
52 the Democratic Republic of the Congo [2] followed by sporadic outbreaks mainly in West and  
53 Central Africa [3]. Even though about 400 confirmed cases of Mpox from these areas were  
54 reported in the last two decades, the suspected number of cases has been predicted to be much  
55 higher, to around 28,000 [4]. While Mpox remains a neglected tropical disease, the 2003  
56 outbreak in the United States generated international attention and the global outbreak in 2022  
57 with more than 85,000 cases in more than 100 countries led to the declaration of a Public Health  
58 Emergency of International Concern by the World Health Organization [5]. Mpox is caused by  
59 the Mpox virus (MPXV), which is an enveloped double-stranded DNA virus with an AT-rich  
60 (67% on average) genome of about 200 kb encoding 190 open-reading frames [6]. It is a member  
61 of the Orthopoxvirus genus that also contains several viruses of great medical relevance,  
62 including variola virus, the causative agent of smallpox; vaccinia virus, the virus used in the  
63 smallpox vaccine; cowpox, camelpox, and a few other species that could infect humans [7].  
64 Currently, MPXV is classified into two major clades, each with distinct geographical, clinical,  
65 genomic, and epidemiological differences [8]. Viruses from Clade I (former Congo Basin clade)  
66 cause more clinically severe disease in humans, with higher mortality rates and transmissibility,  
67 while those from Clade IIa (former West African clade) have a milder clinical presentation with  
68 lower mortality rates and transmissibility. The isolates from the most recent 2022 outbreak are  
69 placed in Clade IIb and closely related to the virus responsible for the 2017-2019 outbreaks in  
70 the same clade [8-10].

71 Human-to-human transmission of MPXV can occur by direct contact, respiratory  
72 secretions, vertical transmission, or indirect contact through fomites. Direct contact with  
73 infectious sores or lesions on mucous membranes has been the primary mode of transmission  
74 during the 2022 outbreak [11]. Mpox diagnosis is based on suspected epidemiological and  
75 clinical symptoms and confirmed by nucleic acid amplification testing, mainly real-time PCR.  
76 The recommended diagnostic specimens are directly from skin lesions or biopsies [12, 13]. Viral  
77 DNA can also be detected in saliva [14], semen, blood, or urine samples, even though usually  
78 less frequently and with a lower viral load [15-17] but could potentially help early detection of  
79 Mpox before the development of skin lesions. At present, detecting viral DNA by quantitative  
80 polymerase chain reaction (qPCR) is the recommended laboratory test for Mpox [18]; indeed, a  
81 positive PCR result is considered definitive, regardless of associated symptoms. However, the  
82 qPCR method requires complex and expensive equipment. In rural areas or low-resource settings  
83 without access to high-precision PCR instruments, a faster and simpler method for Mpox testing  
84 is needed as a viable alternative. Loop-mediated isothermal amplification (LAMP) is a nucleic  
85 acid amplification method that uses a Bst DNA polymerase with strand displacement activity.  
86 The assay is conducted under isothermal conditions ranging from 60-66°C and is fast and simple  
87 to use, making it ideal for the diagnosis and surveillance of neglected tropical diseases [19].  
88 LAMP diagnostic assays have also been successfully used as a point-of-care diagnostic tool  
89 during the SARS-CoV-2 pandemic [20-22].

90 In this study, we developed a pan-Orthopoxvirus colorimetric LAMP assay as well as a  
91 fluorescent probe-based MPXV-specific LAMP assay. In addition, we described a protocol to  
92 detect viral DNA directly from the swab samples without the need for a DNA extraction step.  
93 Given the constant threat and continued transmission of MPXV in different parts of the world

94 [23], accessibility to testing is critical for worldwide control efforts. Our simple and quick  
95 colorimetric LAMP assay can improve the testing capability, especially in remote and low-  
96 resource areas.

## 97 **Materials and methods**

### 98 **Ethical approval**

99 All samples submitted in the study were obtained in accordance with ethical guidelines and  
100 remain anonymous. Any identifying information was de-identified to maintain confidentiality  
101 and the samples were labeled using a barcode for identification purposes only. The de-identified  
102 (barcoded) samples (swabs from lesions) were submitted to Mirimus Clinical Laboratory and  
103 collected within the interim guidelines for laboratory testing established by the WHO (May 23<sup>rd</sup>,  
104 2022). Sample collection and submission methods for use in the Mirimus Clinical Laboratory  
105 study protocol were reviewed and approved by Advarra Institutional Review Board  
106 Pro00065623.

### 107 **Phylogenomic and homolog analysis**

108 Genome assemblies for all OPXV available as on May 18<sup>th</sup>, 2022 were downloaded from  
109 GenBank, and protein coding genes in each assembly were annotated using PROKKA version  
110 1.14.6 [24]. Genomes of Centapox viruses Yokapox, Murmansk virus and Centapox NY014  
111 were downloaded for use as outgroups. Metadata on the source of isolation of each virus was  
112 compiled (S1 Table). Orthology analysis and identification of single copy orthologs for  
113 phylogenomic analysis were performed using Orthofinder version 2.4.0 [25]. The gene

114 sequences corresponding to the identified SCOs were concatenated together to generate a  
115 supermatrix sequence for each species, and their multiple sequence alignment was obtained  
116 using mafft v7.149b [26]. Phylogenetic analysis of the resulting supermatrix of 33,425  
117 nucleotides was carried out using W-IQ-TREE [27] where the best-fit substitution model was  
118 chosen automatically using ModelFinder [28] and bootstrap support values were calculated  
119 based on ultrafast bootstrap [29] with 1000 replicates. The OPXV clades were named as  
120 phylogroups 1 to 10 and denoted as OPXV-PG-1 to OPXV-PG-10. To identify orthogroups that  
121 are present or absent across various phylogroups, protein sequences from each isolate within a  
122 phylogroup were first combined into a pan-phylogroup proteome and were then used for  
123 orthology analysis using OrthoFinder version 2.4.0 [25]. The conservation of orthogroups across  
124 various phylogroups was visualized as an UpSet plot [30]. Homologs of MPXV A4L and N1R  
125 genes were identified through NCBI Blast search. Alignments of downloaded homologs were  
126 aligned using ClustalW (<https://www.genome.jp/tools-bin/clustalw>).

## 127 **Control virus DNA and MPXV samples**

128 Genomic DNA from MPXV USA-2003 (BEI, #NR-4928, Lot 70053399, at least 98% identical  
129 to GenBank accession number NC\_063383) and synthetic hMPXV control 2 (Twist Bioscience,  
130 # 106059, Lot 2000006347 identical to GenBank accession number NC\_063383) were used as  
131 the template for LAMP assays. Genomic DNA from camelpox virus strain V78-2379 (BEI,  
132 #NR-50076, Lot 64108452, 99% identical to GenBank accession number NC\_003391) and  
133 vaccinia virus WR (BEI #NR-2640, Lot 60981371, GenBank: NC\_006998) were also used for  
134 specificity analysis. Three clinical MPXV DNA samples and their corresponding swab eluates  
135 samples were donated by Mirimus Inc. Human genomic DNA (Promega #G3041, Lot

136 0000531679) was used as the negative control. Viral DNA was aliquoted into small volumes and  
137 stored at -80°C until use.

## 138 **Real-Time PCR**

139 Real-Time PCR was performed using the Luna® Universal Probe qPCR Master (NEB #M3004)  
140 following the manufacturer's instructions. Each 20 µL reaction contained 2 µL template DNA.  
141 CDC-Non-Variola Orthopoxvirus Forward primer (5'-TCAACTGAAAAGGCCATCTAT GA-  
142 3'), Reverse primer (5'-GAGTATAGAGCACTATTTCTAAATCCCA-3') and dual quencher  
143 modified probe (5'-FAM-CCATGCAAT/ZEN/ATACGTACAAGATAGTAGCCAAC-  
144 3'IABkFQ) were used [31]. The reactions were performed on a Bio-Rad CFX Opus instrument  
145 using the following cycling conditions: initial denaturation (95°C for 1 min) followed by 45  
146 cycles of alternating denaturation (95°C for 10 sec) with annealing/elongation (60°C for 30 sec)  
147 plus a plate read step.

## 148 **Colorimetric and probe-based LAMP assay**

149 LAMP primer design was based on MPXV reference genomes NC\_003310 and NC\_063383.  
150 Multiple genes were chosen for LAMP primer design using the NEB Primer Design Tool  
151 (<https://lamp.neb.com/>). Among the 14 sets of LAMP primers (S2 Table) tested targeting various  
152 genes, 2 sets of primers showed the best performance and were chosen for this study (Table 1).  
153 Each primer set included an outer forward primer (F3), outer backward primer (B3), forward  
154 inner primer (FIP), backward inner primer (BIP), forward loop primer (LF), and backward loop  
155 primer (LB). Primers were synthesized by Integrated DNA Technologies™ (Coralville, IA,  
156 USA).



157 **Table 1. LAMP primer sequences targeting A4L and N1R.**

| Primer  | Sequence 5'-3'                                 |
|---------|------------------------------------------------|
| A4L_F3  | CAAGGATATTTATTCTATGGCATT                       |
| A4L_B3  | CCAAACATATTCTTATTCTGACGT                       |
| A4L_FIP | TCCAGAACATCTCCATAGCCTAGATGGCAATAGTGGGAAGAGTG   |
| A4L_BIP | TACACACATTGATCCATTGGGAACCATCATTGCTCCATTAACGATA |
| A4L_LF  | TGTTAGGAGGAGCGAACAC                            |
| A4L_LB  | TAATGTGATGGGTAGTGCTGT                          |
| N1R_F3  | GAATTGATGCAATGGAGCTA                           |
| N1R_B3  | GCAGCATAAGTAGTATGTCG                           |
| N1R_FIP | TCTCCACGCAATTGTCGATATTGGTAGCGAGTTGAAGGAGTT     |
| N1R_BIP | ACTCCATGAAAACCGCCAAAGAAGACTCTCCAGTGACA         |
| N1R_LF  | CCACGGAAGTGAATTCGAG                            |
| N1R_LB  | TGGACTTTGTAICTCAATCAGCT                        |

158

159 The colorimetric LAMP assay was performed using the WarmStart® Colorimetric  
160 LAMP 2X Master Mix with UDG (NEB #M1804). Each 20 µL reaction contained 10 µL 2X  
161 Master Mix, 2 µL 10X primer mix to their final concentration F3/B3 0.2 µM each; FIP/BIP 1.6  
162 µM each; LF/LB 0.4 µM each), 2 µL 10X guanidine hydrochloride (400 mM), 2-4 µL of DNA  
163 or crude swab eluate, and DNase/RNase free water. Reactions were assembled in 96-well plates  
164 on ice followed by incubation at 65°C for up to 1 hour. Samples were considered positive for the  
165 presence of the virus if the reaction had a color change from pink to yellow, or negative if the  
166 reaction remained pink. To record color changes, 96-well plates were imaged using an Epson  
167 Perfection V600 Photo Scanner before and after the LAMP reaction. To enable reaction  
168 dynamics to be monitored in real-time, 1 µM of SYTO™ 9 Green Fluorescent Nucleic Acid  
169 Stain (Invitrogen) was included in the LAMP reaction and the reactions performed in a qPCR  
170 machine (Bio-Rad CFX Opus). The Cq number was converted to Tt which represents the time in  
171 minutes to reach the fluorescence detection threshold, using a conversion factor of 22 seconds  
172 per cycle. No amplification is denoted N/A. Experiments were conducted using at least two  
173 replicates.

174 Probe-based LAMP assays were performed with a fluorescent-based LAMP kit (NEB  
175 #E1700) with 0.25 $\mu$ M MPXV\_Probe (/5Cy5/T+T+GTGCAA+T+AAT+TGGAC/3IAbRQSp/) instead of the fluorescent dye included in the kit. The hybridization probe contains a 5' Cy5  
176 fluorophore and a 3' end dark quencher and locked nucleic acid (LNA) bases indicated by a  
177 preceding + symbol. The probe was synthesized by Integrated DNA Technologies™ (Coralville,  
178 IA, USA). All probe-based reactions were performed in a qPCR machine (Bio-Rad CFX Opus).  
179

## 180 **Molecular testing of clinical swab samples**

181 De-identified (barcoded) swab samples were used within the study. Dry swab specimens were  
182 rehydrated in 1 mL TE buffer (ThermoFisher, Catalog#J75793-AP). For the standard qPCR test,  
183 100  $\mu$ L of eluate was subjected to nucleic acid extraction and purification using the KingFisher  
184 Flex automated nucleic acid extraction (ThermoFisher, Catalog A48383), and 2.5  $\mu$ L of purified  
185 DNA was amplified and detected using 4X Luna MasterMix (NEB, Catalog#M3019B) and  
186 CDC-defined primer/probe sets (S2 Table) in a total of 5  $\mu$ L of reaction. For extraction-free  
187 LAMP test, swab eluates were treated similarly as saliva as previously described [20]. Briefly, an  
188 equal volume of eluates was mixed with an equal volume of 2X SLB buffer containing 5 mM  
189 tris(2-carboxyethyl) phosphine (TCEP, Millipore Cat# 580567), 22 mM sodium hydroxide  
190 (Sigma 72068), 2 mM Ethylenediaminetetraacetic acid (EDTA, Invitrogen 15575–038) and 0.4%  
191 Pluronic F-68 (Gibco 24040–032). Mixed samples were heated in a thermocycler at 95°C for 5  
192 minutes, then cooled to 4°C. For each LAMP reaction, 4  $\mu$ L of the treated sample, corresponding  
193 to 2  $\mu$ L of swab eluate, was used in the 20  $\mu$ L reaction.

## 194 **Results**

### 195 **Phylogenomic analysis of Orthopoxvirus genomes**

196 A phylogenomic analysis of 200 Orthopoxvirus genomes, identified 10 distinct clades within this  
197 genus, which are here named as phylogroups 1 to 10 and are denoted as OPXV-PG-01 to OPXV-  
198 PG-10 (Fig 1) based on their nesting patterns (S1 Fig), where the 100 MPXV isolates included in  
199 this analysis are placed in OPXV-PG-06. Two distinct clades are observed within OPXV-PG-06,  
200 which correspond to the recently described MPXV Clade I and Clade II [4], with isolates from  
201 the 2022 global outbreak placed in Clade II (Fig 1). The phylogroup most closely related to  
202 MPXV is OPXV-PG-05 which contains all Vaccinia virus isolates, as well rabbitpox, buffalopox  
203 and horsepox viruses. The next closest virus was a so-called cowpox virus which was isolated  
204 from a cat [32] and does not cluster within any of the phylogroups. Other “cowpox” viruses have  
205 been isolated from a diverse set of host animals other than cows, such as humans, cats, alpaca  
206 and rodents (S1 Table). These viruses do not form a monophyletic clade but rather are seen as 4  
207 distinct clades PG-02, PG-03, PG-04 and PG-07, each containing a mixture of both human and  
208 non-human derived isolates (Fig 1). The raccoonpox, volepox and skunkpox viruses were placed  
209 together in OPXV-PG-10 and showed much longer branch lengths making them the most distant  
210 members within the Orthopoxvirus genus (Fig 1). Analysis of pan-phylogroup proteomes formed  
211 by combining protein sequences from each isolate within a phylogroup, revealed common and  
212 distinct orthogroups present in various phylogroups (S2 Fig). A total of 162 orthogroups were  
213 present across the Orthopoxvirus genus as well as in the Centapox outgroup, and 14 orthogroups  
214 were present in the Orthopoxvirus genus but absent from the Centapox genus. This analysis also  
215 showed 36 orthogroups that were present only in the pan-MPXV proteome. However, none of

216 these orthogroups were present across all MPXV isolates, precluding their use as MPXV specific  
217 biomarkers. Analysis of source of Orthopoxviruses from which they were isolated (S1 Table )  
218 revealed that viruses isolated from human were distributed throughout the tree (red asterisk in  
219 Fig 1) and interspersed with closely related isolates from various animal hosts. This distribution  
220 pattern indicates the dramatic zoonotic potential and disease risk of these viruses, highlighting  
221 the need for a pan-Orthopoxvirus detection assay.

222 **Fig 1. Phylogenomic tree of Orthopoxviruses.** An unrooted phylogenomic tree of 200  
223 Orthopoxviruses with genomes available in NCBI, including 100 genomes from various MPXV  
224 was constructed based on 44 single copy orthologs, with a combined supermatrix sequence  
225 length of 33,425 nucleotides. The Centapoxviruses were used as an outgroup. The substitution  
226 model GTR+F+I+G4 was found to be the best fit for the sequences. The phylogroups are color  
227 coded and indicated by corresponding labels. The virus isolates derived from infected humans  
228 are marked with red asterisks.

## 229 **Colorimetric LAMP assay development and sensitivity**

230 A total of 14 sets of primers (S2 Table) targeting 8 different genes were tested in the colorimetric  
231 LAMP assays with fluorescent dye. Primers (Table 1) targeting the A4L (set 2) gene and the  
232 N1R (set 3) gene showed the best performance with the earliest signal detection and no  
233 background. The optimal LAMP reaction temperature was found to be 65°C with 40mM GuHCl  
234 included as an additive to speed up the reaction [33].

235 The sensitivity of the colorimetric A4L and N1R LAMP assays was first evaluated using  
236 a serial dilution of synthetic Mpox synthetic DNA. As shown in Fig 2A, synthetic DNA can be  
237 detected at 62.5 copies/ $\mu$ L in all triplicate reactions with either A4L or N1R LAMP primers. At

238 31.25 copies/ $\mu$ L, 8 out of 9 reactions (A4L LAMP) or 7 out of 9 reactions (N1R LAMP) showed  
239 a positive color change. As expected, the LAMP reaction containing both sets of LAMP primers  
240 improved the sensitivity and enabled the detection of all 9 reactions at 31.25 copies/ $\mu$ L.

241 A direct comparison of the A4L+N1R colorimetric LAMP assay to the CDC Non-variola  
242 Orthopoxvirus Generic Real-Time PCR Test was performed using MPXV genomic DNA. As  
243 shown in Fig 2B, all replicates tested positive in the LAMP assay down to 50 copies/ $\mu$ L with  
244 relatively late Cq values (>38) in the CDC qPCR assay. At 25 copies/ $\mu$ L, 2 out of 3 reactions  
245 showed a positive color change in the LAMP assay, whereas an average Cq value of 39.4 was  
246 observed in the CDC qPCR assay. Therefore, the LAMP assay showed comparable sensitivity to  
247 the current gold standard qPCR assay, while being easier to perform.

248 **Fig 2. A4L and N1R LAMP assays can detect MPXV DNA.** (A) MPXV synthetic DNA was  
249 diluted from 500 to 31.25 copies/ $\mu$ L in 0.1X TE buffer containing 1 ng/ $\mu$ L human DNA. 4  $\mu$ L of  
250 DNA was tested in 20  $\mu$ L LAMP reactions with either A4L primer set or N1R primer set or both.  
251 Scanned images of the post-amplification plate showing the colorimetric (pink = negative,  
252 yellow = positive) readouts are shown. (B) MPXV genomic DNA was diluted from 200 to 3.125  
253 copies/ $\mu$ L and 4  $\mu$ L of DNA was tested in colorimetric LAMP or CDC qPCR assays. The  
254 scanned image of the post-LAMP amplification plate and Cq number of CDC qPCR are shown.  
255 No amplification is denoted N/A. All reactions were performed in triplicates.

## 256 **Specificity of A4L and N1R LAMP primer sets**

257 The A4L gene is located in the more conserved central region of the viral genome and encodes  
258 the precursor of the essential major virion core protein p4b within the Orthopoxvirus. When the

259 target DNA region of A4L LAMP was used to blast against all Monkeypox virus genomes in the  
260 NCBI database (on 3/31/2023), 4999 of the 5000 sequences are identical to the query sequence  
261 except for 1 sequence (OQ411312.1) due to one nucleotide N. The A4L gene sequence was also  
262 found to be almost identical in the majority of Orthopoxviruses with 1 to 3 nucleotide differences  
263 in the LAMP targeting region (S3 Fig). The most common difference is an A to C substitution  
264 which is located between the LB and B2 primer region and is not targeted by any primer,  
265 therefore it should not impact the performance of the LAMP reaction. The effect of nucleotide  
266 differences located within the LAMP primer binding sites such as single nucleotide differences  
267 located in either the F2 or F1c primer region (S3 Fig) were tested with genomic DNA from  
268 CMLV or VACV, which harbor these substitutions. As shown in Fig 3, these differences did not  
269 impact the ability of the A4L LAMP to detect the CMLV and VACV genomic DNAs, as  
270 successful amplifications were observed with Tt values within 10 minutes and a positive color  
271 change from pink to yellow (Fig 3) consistent with previous report on LAMP tolerance of  
272 sequence variation [34]. A blast search of the A4L target outside of the Orthopoxvirus genus  
273 found the Yoka poxvirus (Centapoxvirus genus within the Poxviridae family) as the closest hit  
274 with 79% sequence identity to the MPXV A4L gene (S3 Fig). Within the LAMP primer regions,  
275 46 mismatched nucleotides were found, making it unlikely that the LAMP assay would amplify  
276 the Yoka poxvirus or other non-Orthopoxvirus. Taken together, these results indicate that the  
277 highly conserved A4L gene can be used as a pan-Orthopoxvirus biomarker in LAMP assays.

278 **Fig 3. A4L and N1R LAMP assays on genomic DNA from various Orthopoxvirus.** Genomic  
279 DNA from Camelpox virus (CMLV), Vaccinia virus (VACV), and Mpox virus (MPXV) diluted  
280 10 or 100-fold were tested in A4L and N1R colorimetric LAMP assays containing 1 $\mu$ M SYTO™  
281 9 fluorescent dye. Real-time fluorescence and colorimetric (pink = negative, yellow = positive)

282 readouts were obtained for each sample. The scanned image of the post-amplification plate is  
283 shown with overlaid Tt values defined as the time (min) to reach threshold fluorescence values  
284 during the amplification. No amplification is denoted N/A. Experiments were performed with  
285 two replicates.

286         The N1R gene is located towards the termini of the genome and encodes a Poxvirus Bcl-  
287 1-like protein, predicted to be involved in evading the host's innate immune response. It is highly  
288 conserved among different MPXV isolates with 99.4% (4970/5000 on 3/31/2023) sequences in  
289 the NCBI database showing 100% identity to the query N1R LAMP target sequence while the  
290 remaining 0.6% (30/5000) sequences contain a single nucleotide difference located either in LF  
291 (A to G) or LB (C to T) primer binding region. No N1R homologs were found outside of the  
292 Orthopoxvirus genus based on the NCBI Blast search. Within Orthopoxvirus, the gene is more  
293 variable with multiple nucleotide differences (Fig 4 and S4 Fig). The effect of these differences  
294 was tested using genomic DNA from CMLV and VACV. CMLV N1R gene contains multiple  
295 nucleotide mismatches in the primer binding regions, including 3 in F3, 2 in B2, and 1 in LF.  
296 While 100-fold diluted MPXV DNA can be detected with a Tt value of 14 minutes, only 1 out of  
297 2 reactions showed a positive result for CMLV DNA at that dilution, and with a significant  
298 delay of the amplification as indicated by a higher Tt value of 43 minutes (Fig 3) reflecting  
299 decreased amplification efficiency from mismatched nucleotides. No positive amplification was  
300 observed for VACV DNA because the corresponding sequence of this genomic DNA  
301 (NC\_006998) lacks the N1R gene, different from other VACV isolates which contain the N1R  
302 gene with a similar number of mutations as CMLV (S4 Fig). Taken together, this N1R assay  
303 showed some selectivity towards MPXV compared with CMLV, it is not specific for MPXV.

304 **Fig 4. Alignment of N1R LAMP target sequence from various Orthopoxvirus.** N1R target  
305 sequences were downloaded from NCBI and aligned with ClustalW. Nucleotides different from  
306 the MPXV sequence are indicated in bold red. Primer regions are highlighted in yellow or cyan.  
307 Nucleotide sequences used for the detection probe are shown in bold blue and underlined.

## 308 **Probe-based LAMP is specific for MPXV**

309 Fluorescent detection probes with locked nucleic acid (LNA) bases have been used to  
310 distinguish SARS-CoV-2 variants in LAMP assays [35]. A probe targeting the N1R region  
311 between B1c and LB was designed to take advantage of the 2 nucleotide differences between  
312 CMLV and MPXV (Fig 4). When the probe was used in N1R LAMP reactions, amplification  
313 curves were observed only in the presence of MPXV genomic DNA, whereas no signal was  
314 detected with CMLV or VACV genomic DNA (Fig 5A), indicating the probe can distinguish  
315 DNA templates with 2 nucleotide difference in the probe binding region. While most of the N1R  
316 homologs were found to contain several nucleotide differences in the probe binding region, an  
317 exception was found in some variants of the Variola virus, for example in the genome of  
318 LR800247.1 (Fig 4) which contains only 1 nucleotide mismatch in the probe region. Due to the  
319 unavailability of Variola viral DNA for testing, a synthetic gBlock based on the MPXV  
320 backbone was designed to include all 6 nucleotide changes within the LAMP targeted region to  
321 mimic the variola N1R gene (S Text). N1R gBlocks for MPXV and CMLV were also  
322 synthesized and tested (Fig 5B). When a range of 10 to 10,000,000 copies of MPXV gBlocks  
323 was tested, 100 copies were reliably detected. In contrast, even at the highest copy number of  
324 10,000,000, CMLV N1R gBlock could not be detected. For the variola mimic gBlock, very low  
325 amplification signals were observed, however, they were below the baseline fluorescence



326 threshold and therefore scored negative. These experiments demonstrated that the probe-based  
327 LAMP assay can be used for specific detection of MPXV. To determine the sensitivity, a serial  
328 dilution of MPXV genomic DNA was tested, and reliable detection down to 62.5 copies/ $\mu$ L was  
329 observed around 20 minutes, whereas at 31.25 copies/ $\mu$ L, 8 of 9 reactions scored positive (Fig 5  
330 C-D). Overall, this probe-based LAMP assay is both specific and sensitive.

331 **Fig 5. Specificity and sensitivity of probe-based LAMP assay.** Probe-based LAMP reactions  
332 were performed in a Bio-Rad Opus qPCR machine with various DNA templates. The fluorescent  
333 amplification curves generated from the fluorescent probe are shown. (A) Genomic DNA from  
334 MPXV (blue), CMLV (green), and VACV (purple) were diluted 10-fold in 0.1X TE and tested in  
335 triplicate. (B) A 10-fold dilution series N1R gBlocks ranging from 5,000,000 to 5 copies/ $\mu$ L  
336 from MPXV (blue), CMLV (green), and the Variola mimic (red) were tested in duplicate.  
337 Representative amplification curves from 1 replicate are shown. (C) MPXV genomic DNA was  
338 serial diluted over a range of 500 to 31.25 copies/ $\mu$ L and tested in triplicate. (The Tt values  
339 measuring the incubation time in minutes to reach the fluorescent threshold were calculated from  
340 the Cq number and shown in (D).

## 341 **An extraction-free method for rapid detection of MPXV in clinical** 342 **samples**

343 Most molecular diagnostic protocols for MPXV detection involve DNA extraction from lesion  
344 material, such as lesion fluid on a dry swab. However, DNA extraction is a time-consuming and  
345 expensive process. An extraction-free colorimetric LAMP method has been successfully applied  
346 for SARS-CoV-2 detection in clinical samples [20]. This approach was evaluated and found to

347 work well for MPXV detection directly from swab eluate when compared with the standard CDC  
348 qPCR method using purified DNA. After the eluates of lesion swabs from 3 patients were mixed  
349 with sample prep buffer and heated at 95°C for 5min, all three treated crude generated positive  
350 color change in the colorimetric LAMP assay (Fig 6). Consistent with the viral titer  
351 demonstrated by the qPCR assay, as little as 0.0625  $\mu$ L of the eluate from the high viral  
352 containing Swab 1 is sufficient to generate a positive result in the colorimetric LAMP assay,  
353 while 2  $\mu$ L eluate from the low viral containing Swab 3 was needed. Therefore, the extraction-  
354 free LAMP method displayed comparable performance to qPCR on purified DNA.

355 **Fig 6. Direct virus detection of clinical swab eluate.** Elute from the swab was mixed with an  
356 equal volume of 2X SLB buffer and heated at 95°C for 5min, then cooled to 4°C. For each  
357 LAMP reaction, 4 $\mu$ L of swab or serially diluted swab in 1X SLB was used. Water or 1XSLB  
358 buffer was used as the negative control, and MPXV Twist DNA was used as a positive control.  
359 The experiment was done in duplicate.

## 360 Discussion

361 Members of the genus Orthopoxvirus are highly prevalent, zoonotic viruses that infect many  
362 mammals, and are particularly relevant to human health. While smallpox has been eradicated, the  
363 recent global outbreak in 2022 of Mpox caused by MPXV underscores the constant threat from  
364 these viruses and highlights the need for diagnostic tools for continued surveillance. The design  
365 and development of such assays require an understanding of the relationships between various  
366 Orthopoxviruses. Here we have utilized ~200 genome sequences available in public databases to  
367 construct a comprehensive phylogenomic tree covering all known Orthopoxviruses. This  
368 analysis showed the presence of 10 distinct clades, denoted as phylogroups OPXV-PG-01 to

369 OPXV-PG-10. No clear correspondence between the viruses within a phylogroup and their host  
370 species was found. For example, the so-called cowpox virus has been isolated from diverse  
371 animals, and these isolates were placed in multiple phylogroups, consistent with previous reports  
372 [32]. This demonstrates the importance of using genetic sequence and phylogenies for  
373 informative nomenclature and accurate classification for Orthopoxviruses, rather than naming  
374 them after the host species or their phenotypic properties [32]. Interestingly, various  
375 Orthopoxviruses which have been isolated from human subjects do not cluster together in a  
376 particular phylogroup but are distributed across the tree, illustrating that viruses from any of the  
377 phylogroups could be a threat to human health and agents of global outbreaks [36, 37]. A pan-  
378 Orthopoxvirus assay would be useful for monitoring animal reservoirs as well as new outbreaks  
379 in humans, while a species-specific viral test would be required for accurate diagnosis and  
380 treatment during a particular outbreak.

381         MPXV has been responsible for multiple outbreaks in recent decades. There are  
382 numerous ways to detect MPXV, including the detection of viral particles, virus-specific  
383 antigens, and many PCR-based methods [38]. The goals of the present study were to develop an  
384 isothermal, simple, rapid, and robust workflow for both pan-Orthopoxvirus and Mpox-specific  
385 diagnosis. In resource-limited settings, where access to thermocyclers and a stable electricity  
386 supply is challenging, LAMP-based assays are attractive. Several isothermal amplification-based  
387 assays, including LAMP and recombinase polymerase amplification, have been developed for  
388 diagnosing MPXV infection [39, 40] and used turbidimeters or gel electrophoresis instruments  
389 for readout, whereas our colorimetric LAMP test provides a simple visual readout.

390         One of the CDC's clade-specific assays targets the tumor necrosis factor (TNF) receptor  
391 gene (G2R) [41, 42] which is located within the terminal inverted-repeat region and contains

392 many single nucleotide polymorphisms and insertions/deletions specific for Clade II. However,  
393 in the recent outbreak, new deletions in the G2R target have negatively impacted the  
394 performance of the test resulting in dropouts. This led to a CDC advisory on September 2<sup>nd</sup>, 2022  
395 [43], urging caution in the interpretation of negative results returned from the G2R assay if  
396 clinical suspicion for Mpox was high. The rapid accumulation of mutations in the 2022 MPXV  
397 isolates [44] necessitates the selection of more conserved targets. Our Orthopoxvirus  
398 colorimetric assay included two targets (A4L and N1R), the high conservation of the A4L gene  
399 in Orthopoxvirus and the high conservation of N1R within MPXV, combined with the tolerance  
400 of mismatches in LAMP reactions [34], are expected to prevent false negative results. The A4L  
401 LAMP region was conserved less in the skunkpox, raccoonpox, and volepox viruses with 19 to  
402 30 mismatches in the primer binding region. These viruses form a distinct phylogroup with a  
403 very long branch in the phylogenomic tree indicating they are most distantly related to other  
404 Orthopoxviruses.

405 To achieve specific MPXV detection, a hybridization detection probe was designed and  
406 included in the N1R LAMP assay. The probe-based detection method requires no modification to  
407 the LAMP primers and can be used for the detection of single-nucleotide polymorphisms and  
408 small sequence changes [35]. The LAMP probe in our assay contains a 5' end fluorophore and a  
409 3' end dark quencher. The probe only generates a fluorescent signal upon binding to N1R  
410 amplicons due to the increased structural rigidity of dsDNA and subsequent separation of the  
411 fluorophore and quencher. To enable using a short probe with high T<sub>m</sub>, Locked Nucleic Acid  
412 (LNA) bases were incorporated into the probe, which is important to achieve specificity. The  
413 probe was designed to target the loop region of the LAMP amplicons to provide greater  
414 availability for probe annealing and less frequent displacement by the polymerase and showed

415 little inhibition of the probe to the LAMP reaction. In our assay, a real-time PCR instrument was  
416 used for probe-based fluorescence detection. However, in the field, portable isothermal  
417 fluorimeters, endpoint plate readers, simple illumination instruments, or lateral flow can  
418 potentially be used for signal detection. In a recently published colorimetric LAMP assay  
419 targeting two different genes namely A27L and F3L, high specificity was claimed based on *in*  
420 *silico* analysis [45]. Using the published primer sets for A27L and F3L and their recommended  
421 reaction temperature, we found both CMLV and VACV DNA were detected (S5 Fig) indicating  
422 the assays lack specificity.

423 Most Mpox diagnostic assays in use, including the CDC-recommended assays, utilize  
424 purified DNA in qPCR reactions. In a rapidly expanding viral outbreak, testing can be limited by  
425 the time and cost of nucleic acid extraction steps, as witnessed during the SARS-CoV-2  
426 pandemic. In our study, we used a simple extraction-free method involving a sample lysis buffer  
427 and heat treatment to release the DNA for detection directly from swab eluates. The heat  
428 treatment also inactivates the virus for quick and safe handling [46]. Detection of MPXV in  
429 saliva has been demonstrated to have a sensitivity of 88% compared to skin lesions [47].  
430 Importantly, a saliva-based PCR test identified asymptomatic cases [48] before the appearance of  
431 rash or lesion, indicating that using a saliva test could help detect Mpox earlier in the time course  
432 of the illness. Earlier identification would likely reduce transmission. We expect our extraction-  
433 free colorimetric LAMP method could be used to detect MPXV in saliva as demonstrated  
434 previously for LAMP-based SARS-CoV-2 detection in saliva [20].

## 435 **Acknowledgments**

436 We thank Dr. Tom Evans for guidance and feedback on the manuscript.

## 437 **References**

- 438
- 439
- 440
- 441
- 442
- 443
- 444
- 445
- 446
- 447
- 448
- 449
- 450
- 451
- 452
- 453
- 454
- 455
- 456
- 457
- 458
- 459
- 460
- 461
- 462
- 463
- 464
- 465
- 466
- 467
- 468
- 469
- 470
- 471
- 472
- 473
- 474
- 475
- 476
- 477
- 478
- 479
- 480
- 481
1. Magnus Pv, Andersen EK, Petersen KB, Birch-Andersen A. A Pox-Like Disease in *Cynomolgus* Monkeys. *Acta Pathologica Microbiologica Scandinavica*. 1959;46(2):156-76. doi: 10.1111/j.1699-0463.1959.tb00328.x.
  2. Marennikova SS, Šeluhina EM, Mal'ceva NN, Čimiškjan KL, Macevič GR. Isolation and properties of the causal agent of a new variola-like disease (monkeypox) in man. *Bulletin of the World Health Organization*. 1972;46(5):599-611.
  3. Petersen E, Kantele A, Koopmans M, Asogun D, Yinka-Ogunleye A, Ihekweazu C, et al. Human Monkeypox: Epidemiologic and Clinical Characteristics, Diagnosis, and Prevention. *Infect Dis Clin North Am*. 2019;33(4):1027-43. Epub 2019/04/15. doi: 10.1016/j.idc.2019.03.001. PubMed PMID: 30981594; PubMed Central PMCID: PMC9533922.
  4. Bunge EM, Hoet B, Chen L, Lienert F, Weidenthaler H, Baer LR, et al. The changing epidemiology of human monkeypox—A potential threat? A systematic review. *PLOS Neglected Tropical Diseases*. 2022;16(2):e0010141. doi: 10.1371/journal.pntd.0010141.
  5. Mitja O, Ogoina D, Titanji BK, Galvan C, Muyembe JJ, Marks M, et al. Monkeypox. *Lancet*. 2023;401(10370):60-74. Epub 2022/11/21. doi: 10.1016/S0140-6736(22)02075-X. PubMed PMID: 36403582; PubMed Central PMCID: PMC9671644 lectures, and advisory boards from Gilead Science, ViiV Healthcare, Janssen, MSD, and AstraZeneca, outside of the submitted work. All other authors report no competing interests.
  6. Shchelkunov SN, Totmenin AV, Safronov PF, Mikheev MV, Gutorov VV, Ryazankina OI, et al. Analysis of the monkeypox virus genome. *Virology*. 2002;297(2):172-94. Epub 2002/06/27. doi: 10.1006/viro.2002.1446. PubMed PMID: 12083817; PubMed Central PMCID: PMC9534300.
  7. Shchelkunov SN. An increasing danger of zoonotic orthopoxvirus infections. *PLoS Pathog*. 2013;9(12):e1003756. Epub 2013/12/18. doi: 10.1371/journal.ppat.1003756. PubMed PMID: 24339772; PubMed Central PMCID: PMC3855571.
  8. Luna N, Ramirez AL, Munoz M, Ballesteros N, Patino LH, Castaneda SA, et al. Phylogenomic analysis of the monkeypox virus (MPXV) 2022 outbreak: Emergence of a novel viral lineage? *Travel Med Infect Dis*. 2022;49:102402. Epub 2022/07/16. doi: 10.1016/j.tmaid.2022.102402. PubMed PMID: 35840078; PubMed Central PMCID: PMC9628808.
  9. Benko M, Harrach B, Kajan GL. Phylogenetic analysis of all available monkeypox virus strains shows the close relatedness of contemporary ones. *Heliyon*. 2023;9(1):e12895. Epub 2023/01/17. doi: 10.1016/j.heliyon.2023.e12895. PubMed PMID: 36643900; PubMed Central PMCID: PMC9829444.
  10. Happi C, Adetifa I, Mbala P, Njouom R, Nakoune E, Happi A, et al. Urgent need for a non-discriminatory and non-stigmatizing nomenclature for monkeypox virus. *PLoS Biol*. 2022;20(8):e3001769. Epub 2022/08/24. doi: 10.1371/journal.pbio.3001769. PubMed PMID: 35998195; PubMed Central PMCID: PMC9451062.
  11. Harris E. What to Know About Monkeypox. *JAMA*. 2022;327(23):2278-9. doi: 10.1001/jama.2022.9499.
  12. Thornhill JP, Barkati S, Walmsley S, Rockstroh J, Antinori A, Harrison LB, et al. Monkeypox Virus Infection in Humans across 16 Countries - April-June 2022. *N Engl J*

- 482 Med. 2022;387(8):679-91. Epub 2022/07/23. doi: 10.1056/NEJMoa2207323. PubMed  
483 PMID: 35866746.
- 484 13. World Health Organization. Laboratory testing for the monkeypox virus. Geneva: WHO;  
485 2022. Available from: [https://www.who.int/publications/i/item/WHO-MPX-laboratory-](https://www.who.int/publications/i/item/WHO-MPX-laboratory-2022.1)  
486 2022.1
- 487 14. Hernaez B, Munoz-Gomez A, Sanchiz A, Orviz E, Valls-Carbo A, Sagastagoitia I, et al.  
488 Monitoring monkeypox virus in saliva and air samples in Spain: a cross-sectional study.  
489 Lancet Microbe. 2023;4(1):e21-e8. Epub 2022/11/28. doi: 10.1016/S2666-  
490 5247(22)00291-9. PubMed PMID: 36436538; PubMed Central PMCID:  
491 PMCPMC9691259.
- 492 15. Norz D, Brehm TT, Tang HT, Grewe I, Hermanussen L, Matthews H, et al. Clinical  
493 characteristics and comparison of longitudinal qPCR results from different specimen  
494 types in a cohort of ambulatory and hospitalized patients infected with monkeypox virus.  
495 J Clin Virol. 2022;155:105254. Epub 2022/09/04. doi: 10.1016/j.jev.2022.105254.  
496 PubMed PMID: 36057206; PubMed Central PMCID: PMCPMC9528238.
- 497 16. Martins-Filho PR, Tanajura DM, Alves Dos Santos C. Polymerase chain reaction  
498 positivity and cycle threshold values in biological samples from patients with  
499 monkeypox: A meta-analysis. Travel Med Infect Dis. 2022;50:102448. Epub 2022/09/11.  
500 doi: 10.1016/j.tmaid.2022.102448. PubMed PMID: 36087645; PubMed Central PMCID:  
501 PMCPMC9534025 interest.
- 502 17. Hasso M, Perusini S, Eshaghi A, Tang E, Olsha R, Zhang H, et al. Monkeypox Virus  
503 Detection in Different Clinical Specimen Types. Emerg Infect Dis. 2022;28(12):2513-5.  
504 Epub 2022/10/13. doi: 10.3201/eid2812.221160. PubMed PMID: 36223653; PubMed  
505 Central PMCID: PMCPMC9707591.
- 506 18. Lim CK, Roberts J, Moso M, Liew KC, Taouk ML, Williams E, et al. Mpox diagnostics:  
507 Review of current and emerging technologies. J Med Virol. 2023;95(1):e28429. Epub  
508 2022/12/27. doi: 10.1002/jmv.28429. PubMed PMID: 36571266.
- 509 19. Garcia-Bernalt Diego J, Fernandez-Soto P, Muro A. LAMP in Neglected Tropical  
510 Diseases: A Focus on Parasites. Diagnostics (Basel). 2021;11(3). Epub 2021/04/04. doi:  
511 10.3390/diagnostics11030521. PubMed PMID: 33804255; PubMed Central PMCID:  
512 PMCPMC8000616.
- 513 20. Li Z, Bruce JL, Cohen B, Cunningham CV, Jack WE, Kunin K, et al. Development and  
514 implementation of a simple and rapid extraction-free saliva SARS-CoV-2 RT-LAMP  
515 workflow for workplace surveillance. PLoS One. 2022;17(5):e0268692. Epub  
516 2022/05/27. doi: 10.1371/journal.pone.0268692. PubMed PMID: 35617204; PubMed  
517 Central PMCID: PMCPMC9135294.
- 518 21. Amaral C, Antunes W, Moe E, Duarte AG, Lima LMP, Santos C, et al. A molecular test  
519 based on RT-LAMP for rapid, sensitive and inexpensive colorimetric detection of SARS-  
520 CoV-2 in clinical samples. Sci Rep. 2021;11(1):16430. Epub 2021/08/14. doi:  
521 10.1038/s41598-021-95799-6. PubMed PMID: 34385527; PubMed Central PMCID:  
522 PMCPMC8361189.
- 523 22. Lou D, Meurer M, Ovchinnikova S, Burk R, Denzler A, Herbst K, et al. Scalable RT-  
524 LAMP-based SARS-CoV-2 testing for infection surveillance with applications in  
525 pandemic preparedness. EMBO Rep. 2023;24(5):e57162. Epub 2023/03/24. doi:  
526 10.15252/embr.202357162. PubMed PMID: 36951170; PubMed Central PMCID:  
527 PMCPMC10157315.

- 528 23. Kozlov M. Monkeypox in Africa: the science the world ignored. *Nature*.  
529 2022;607(7917):17-8. doi: 10.1038/d41586-022-01686-z.
- 530 24. Seemann T. Prokka: rapid prokaryotic genome annotation. *Bioinformatics*.  
531 2014;30(14):2068-9. doi: 10.1093/bioinformatics/btu153.
- 532 25. Emms DM, Kelly S. OrthoFinder: phylogenetic orthology inference for comparative  
533 genomics. *Genome Biology*. 2019;20(1):238. doi: 10.1186/s13059-019-1832-y.
- 534 26. Nakamura T, Yamada KD, Tomii K, Katoh K. Parallelization of MAFFT for large-scale  
535 multiple sequence alignments. *Bioinformatics*. 2018;34(14):2490-2. doi:  
536 10.1093/bioinformatics/bty121.
- 537 27. Trifinopoulos J, Nguyen L-T, von Haeseler A, Minh BQ. W-IQ-TREE: a fast online  
538 phylogenetic tool for maximum likelihood analysis. *Nucleic Acids Research*.  
539 2016;44(W1):W232-W5. doi: 10.1093/nar/gkw256.
- 540 28. Kalyaanamoorthy S, Minh BQ, Wong TKF, von Haeseler A, Jermin LS. ModelFinder:  
541 fast model selection for accurate phylogenetic estimates. *Nature Methods*.  
542 2017;14(6):587-9. doi: 10.1038/nmeth.4285.
- 543 29. Hoang DT, Chernomor O, von Haeseler A, Minh BQ, Vinh LS. UFBoot2: Improving the  
544 Ultrafast Bootstrap Approximation. *Molecular Biology and Evolution*. 2018;35(2):518-  
545 22. doi: 10.1093/molbev/msx281.
- 546 30. Conway JR, Lex A, Gehlenborg N, Hancock J. UpSetR: an R package for the  
547 visualization of intersecting sets and their properties. *Bioinformatics*. 2017;33(18):2938-  
548 40. doi: 10.1093/bioinformatics/btx364.
- 549 31. Prevention CfDca. Test Procedure: Non-variola Orthopoxvirus Generic Real-Time PCR  
550 Test. 2022.
- 551 32. Mauldin MR, Antwerpen M, Emerson GL, Li Y, Zoeller G, Carroll DS, et al. Cowpox  
552 virus: What's in a Name? *Viruses*. 2017;9(5):101. doi: 10.3390/v9050101.
- 553 33. Zhang Y, Ren G, Buss J, Barry AJ, Patton GC, Tanner NA. Enhancing colorimetric loop-  
554 mediated isothermal amplification speed and sensitivity with guanidine chloride.  
555 *Biotechniques*. 2020;69(3):178-85. Epub 2020/07/09. doi: 10.2144/btn-2020-0078.  
556 PubMed PMID: 32635743.
- 557 34. Tamanaha E, Zhang Y, Tanner NA. Profiling RT-LAMP tolerance of sequence variation  
558 for SARS-CoV-2 RNA detection. *PLoS One*. 2022;17(3):e0259610. Epub 2022/03/25.  
559 doi: 10.1371/journal.pone.0259610. PubMed PMID: 35324900; PubMed Central  
560 PMCID: PMCPCMC8947081
- 561 35. Zhang Y, Tanner NA. Efficient multiplexing and variant discrimination in reverse-  
562 transcription loop-mediated isothermal amplification with sequence-specific  
563 hybridization probes. *Biotechniques*. 2022;73(5):247-55. Epub 2022/11/03. doi:  
564 10.2144/btn-2022-0096. PubMed PMID: 36321500.
- 565 36. Silva NIO, de Oliveira JS, Kroon EG, Trindade GdS, Drumond BP. Here, There, and  
566 Everywhere: The Wide Host Range and Geographic Distribution of Zoonotic  
567 Orthopoxviruses. *Viruses*. 2021;13(1):43. doi: 10.3390/v13010043.
- 568 37. Shchelkunov SN. An Increasing Danger of Zoonotic Orthopoxvirus Infections. *PLOS*  
569 *Pathogens*. 2013;9(12):e1003756. doi: 10.1371/journal.ppat.1003756.
- 570 38. Ghate SD, Suravajhala P, Patil P, Vangala RK, Shetty P, Rao RSP. Molecular detection  
571 of monkeypox and related viruses: challenges and opportunities. *Virus Genes*.  
572 2023;59(3):343-50. Epub 2023/02/07. doi: 10.1007/s11262-023-01975-3. PubMed  
573 PMID: 36746846; PubMed Central PMCID: PMCPCMC9901828.



- 574 39. Iizuka I, Saijo M, Shiota T, Ami Y, Suzaki Y, Nagata N, et al. Loop-mediated isothermal  
575 amplification-based diagnostic assay for monkeypox virus infections. *J Med Virol.*  
576 2009;81(6):1102-8. Epub 2009/04/22. doi: 10.1002/jmv.21494. PubMed PMID:  
577 19382264.
- 578 40. Davi SD, Kissenkotter J, Faye M, Bohlken-Fascher S, Stahl-Hennig C, Faye O, et al.  
579 Recombinase polymerase amplification assay for rapid detection of Monkeypox virus.  
580 *Diagn Microbiol Infect Dis.* 2019;95(1):41-5. Epub 2019/05/28. doi:  
581 10.1016/j.diagmicrobio.2019.03.015. PubMed PMID: 31126795; PubMed Central  
582 PMCID: PMC9629024.
- 583 41. Li Y, Olson VA, Laue T, Laker MT, Damon IK. Detection of monkeypox virus with real-  
584 time PCR assays. *J Clin Virol.* 2006;36(3):194-203. Epub 2006/05/30. doi:  
585 10.1016/j.jcv.2006.03.012. PubMed PMID: 16731033; PubMed Central PMCID:  
586 PMC9628957.
- 587 42. Li Y, Zhao H, Wilkins K, Hughes C, Damon IK. Real-time PCR assays for the specific  
588 detection of monkeypox virus West African and Congo Basin strain DNA. *J Virol*  
589 *Methods.* 2010;169(1):223-7. Epub 2010/07/21. doi: 10.1016/j.jviromet.2010.07.012.  
590 PubMed PMID: 20643162; PubMed Central PMCID: PMC9628942.
- 591 43. CDC. 09/02/2022: Lab Alert: MPXV TNF Receptor Gene Deletion May Lead to False  
592 Negative Results with Some MPXV Specific LDTs. 2022.
- 593 44. Dobrovolna M, Brazda V, Warner EF, Bidula S. Inverted repeats in the monkeypox virus  
594 genome are hot spots for mutation. *J Med Virol.* 2023;95(1):e28322. Epub 2022/11/19.  
595 doi: 10.1002/jmv.28322. PubMed PMID: 36400742.
- 596 45. Feng J, Xue G, Cui X, Du B, Feng Y, Cui J, et al. Development of a Loop-Mediated  
597 Isothermal Amplification Method for Rapid and Visual Detection of Monkeypox Virus.  
598 *Microbiol Spectr.* 2022;10(5):e0271422. Epub 2022/09/27. doi: 10.1128/spectrum.02714-  
599 22. PubMed PMID: 36154444; PubMed Central PMCID: PMC9603857.
- 600 46. Batejat C, Grassin Q, Feher M, Hoinard D, Vanhomwegen J, Manuguerra JC, et al. Heat  
601 inactivation of monkeypox virus. *J Biosaf Biosecur.* 2022;4(2):121-3. Epub 2022/10/18.  
602 doi: 10.1016/j.jobbb.2022.08.001. PubMed PMID: 36245694; PubMed Central PMCID:  
603 PMC9534137.
- 604 47. Coppens J, Vanroye F, Brosius I, Liesenborghs L, van Henten S, Vanbaelen T, et al.  
605 Alternative sampling specimens for the molecular detection of mpox (formerly  
606 monkeypox) virus. *J Clin Virol.* 2023;159:105372. Epub 2023/01/08. doi:  
607 10.1016/j.jcv.2022.105372. PubMed PMID: 36608620; PubMed Central PMCID:  
608 PMC9792191.
- 609 48. Allan-Blitz LT, Carragher K, Sukhija-Cohen A, Ritchie P, Scott H, Li H, et al.  
610 Laboratory validation and clinical performance of a saliva-based test for monkeypox  
611 virus. *J Med Virol.* 2023;95(1):e28191. Epub 2022/10/03. doi: 10.1002/jmv.28191.  
612 PubMed PMID: 36183189.

## 613 **Supporting information**

614

615 **S1 Fig. A mid-point rooted phylogenomic tree of 200 Orthopoxviruses, rendered in a**  
616 **rectangular layout.** The tree was constructed based on 44 single copy orthologs, with a  
617 combined supermatrix sequence length of 33,425 nucleotides. The Centapoxviruses were used as  
618 an outgroup. The substitution model GTR+F+I+G4 was found to be the best fit for the  
619 sequences. Branch lengths indicated on respective branches, which are not drawn to scale. are  
620 not to scale. The branches are colored by phylogroups. Bootstrap support values are shown at  
621 each node. The phylogroups are color-coded and indicated by corresponding labels.

622

623 **S2 Fig. Analysis of orthogroups shared across various pan-phylogroup proteomes.**

624

625 **S3 Fig. MPXV A4L sequence alignment.** MPXV A4L LAMP targeted sequence was used in  
626 the blast search excluding all the MPXV genomes to obtain all the homologs. (A). Multiple  
627 Sequence Alignment Viewer 1.23.0 (MSA viewer ) of all the homologs within the  
628 Orthopoxvirus. Mismatched nucleotides were marked as red lines. (B). MPXV A4L LAMP  
629 targeted sequence alignment with homologs from CMLV, Variola virus, and VACV tested in the  
630 LAMP assay. Primer regions were highlighted with yellow or green color. Mismatched  
631 nucleotides were bold and colored red in related Orthopoxvirus. (C). A4L sequence alignment  
632 with the distantly related volepox, skunkpox, raccoonpox and yoka poxvirus, the closest related  
633 virus outside the Orthopoxvirus genus.

634

635 **S4 Fig. MPXV N1R sequence alignment.** MPXV N1E LAMP targeted sequence was used in  
636 the blast search excluding all the MPXV genomes to obtain all the homologs. Multiple Sequence

637 Alignment Viewer 1.23.0 (MSA viewer ) of all the homologs within the Orthopoxvirus.

638 Mismatched nucleotides were marked as red lines.

639

640 **S5 Fig. Evaluation of A27L and F3L LAMP primers.** Synthetic human MPXV control DNA  
641 was diluted in human DNA (1ng/ $\mu$ L) from 1000 to 62.5 copies/ $\mu$ L and 4  $\mu$ L of DNA was tested  
642 in 20  $\mu$ L LAMP reactions with either A27L primer set or F3L primer set. LAMP reactions were  
643 performed at 63°C as the published reference described using NEB WarmStart Colorimetric  
644 LAMP mix. Scanned images of the post-amplification plate showing the colorimetric  
645 (pink/negative, yellow/positive) readouts were shown. Genomic DNA from camelpox virus  
646 (CMLV), vaccinia (VACV), and humans were also tested. Experiments were performed in  
647 triplicates.

648 **S1 Table. List of Orthopoxviruses used for phylogenetic analysis.**

649 **S2 Table. List of 14 sets of LAMP primer sequences.**

650 **S3 Table. List of MPOX qPCR reagents and equipment.**

651 **S Text. gBlock sequence of variola N1R mimic and its alignment with N1R gene from**  
652 **MPXV and variola virus.**

653

654

Figure 1

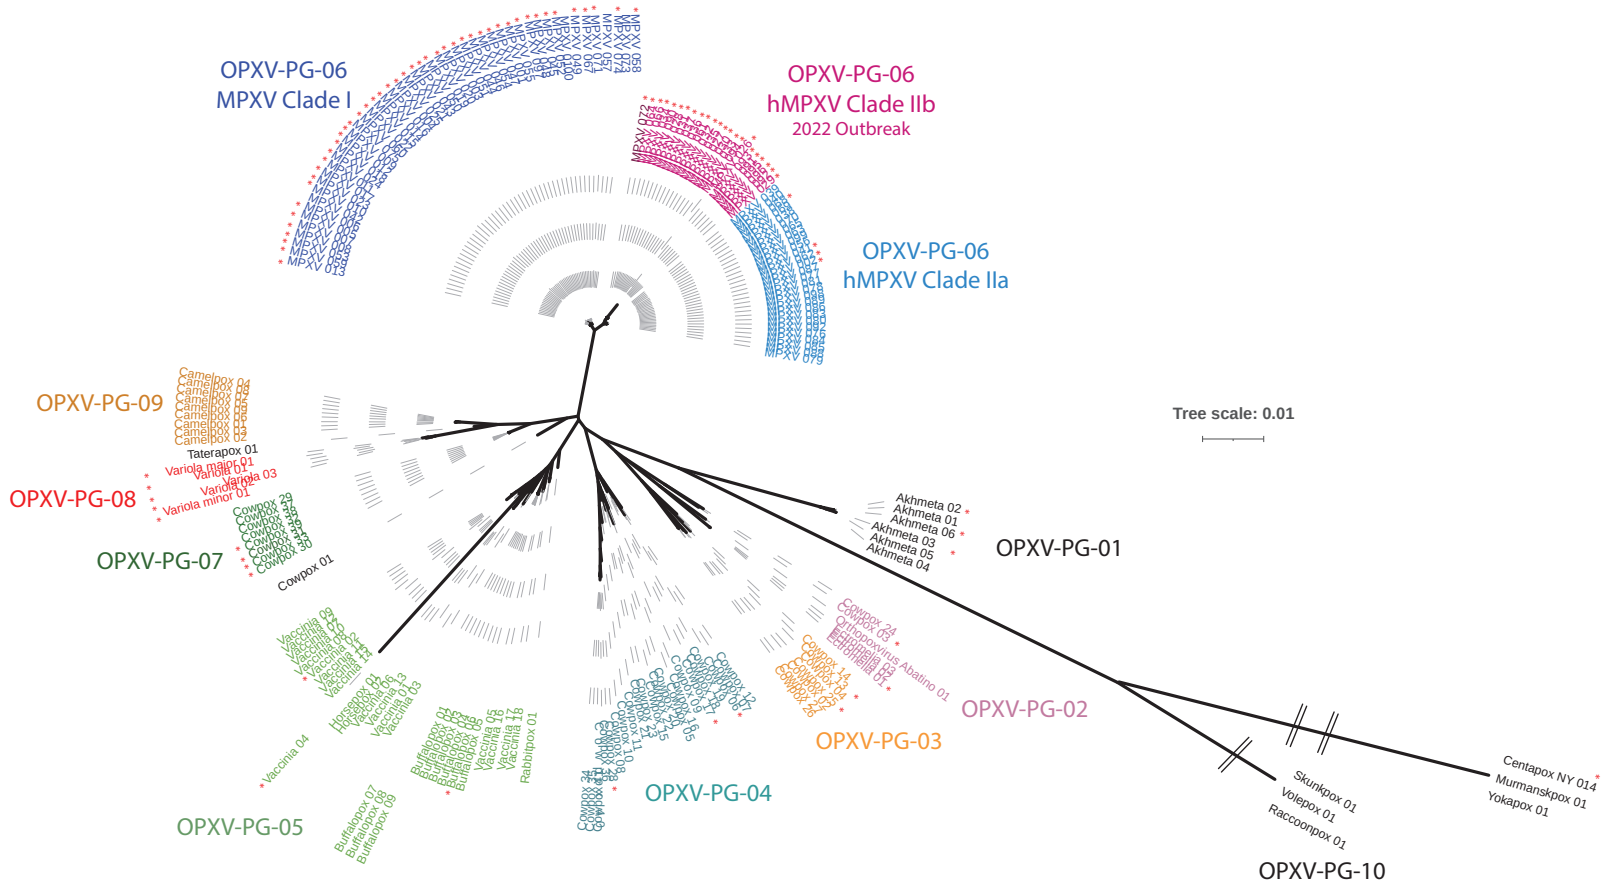

Figure 2

**A**

| Synthetic MPXV DNA copies/ $\mu$ L | A4L LAMP | N1R LAMP | A4L+N1R LAMP |
|------------------------------------|----------|----------|--------------|
| 500                                |          |          |              |
| 250                                |          |          |              |
| 125                                |          |          |              |
| 62.5                               |          |          |              |
| 31.25                              |          |          |              |
| 31.25                              |          |          |              |
| 31.25                              |          |          |              |
| H2O                                |          |          |              |

**B**

| MPXV gDNA copies/ $\mu$ L | A4L+N1R LAMP | CDC qPCR Cq |      |      |
|---------------------------|--------------|-------------|------|------|
| 200                       |              | 36.5        | 37.1 | 36.5 |
| 100                       |              | 37.6        | 37.3 | 37.0 |
| 50                        |              | 38.2        | 38.4 | 38.4 |
| 25                        |              | 40.8        | 38.6 | 38.9 |
| 12.5                      |              | N/A         | 39.9 | 39.8 |
| 6.25                      |              | N/A         | N/A  | N/A  |
| 3.125                     |              | N/A         | 44.9 | N/A  |
| Human DNA                 |              | N/A         | N/A  | N/A  |

Figure 3

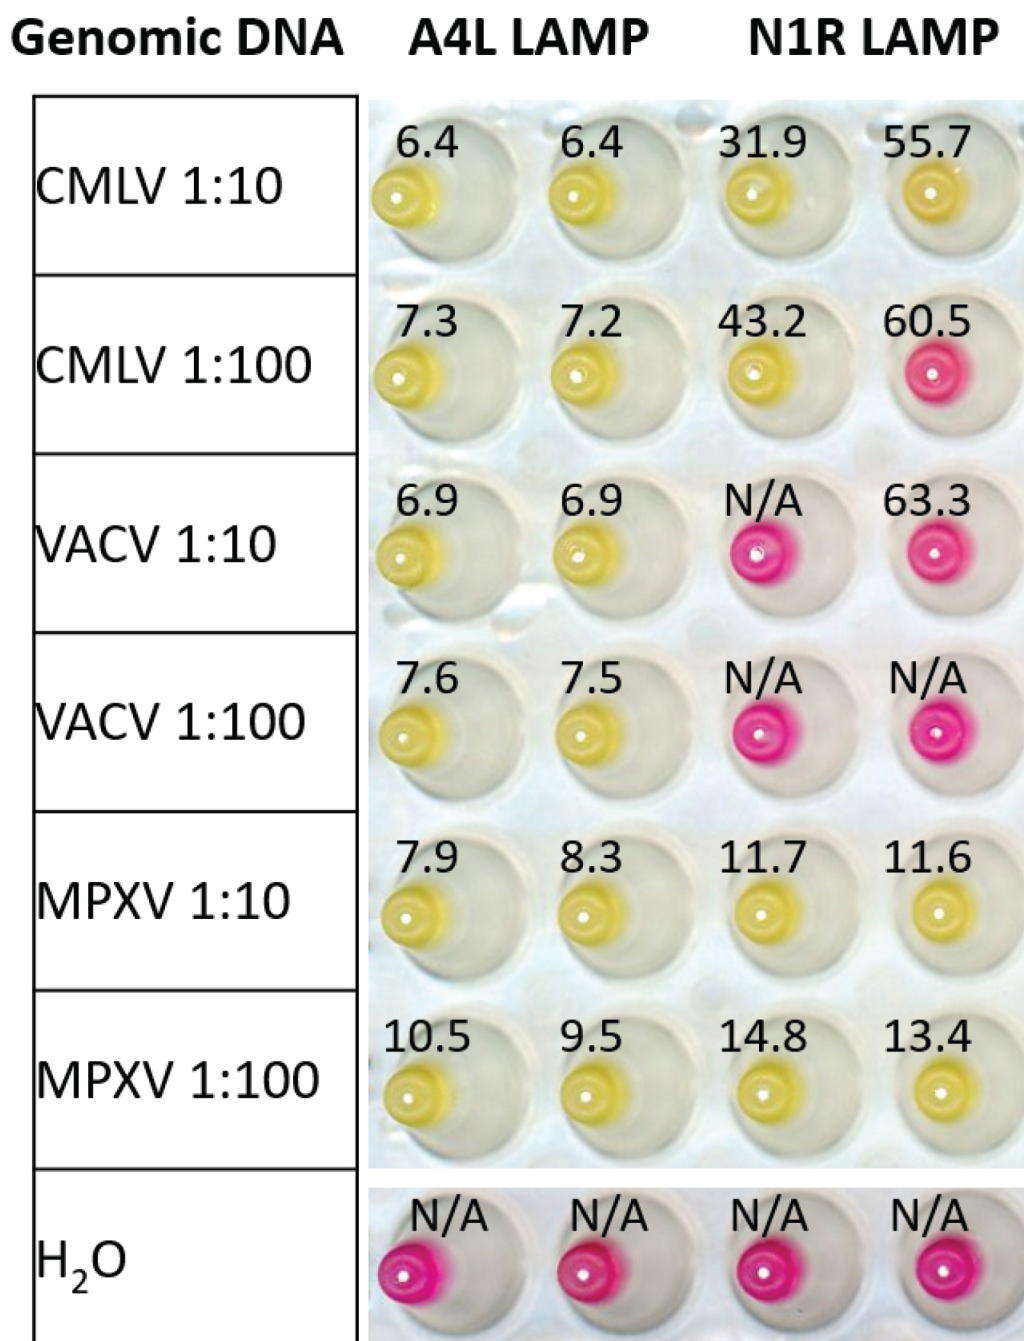

## Figure 4

MN369532.1\_Vaccinia  
NC\_003391\_Camelpox  
LR800247.1\_Variola  
NC\_003310\_Monkeypox\_Zaire  
NC\_063383\_Monkeypox\_USA2003

TACAGGCTTCTCATCTCTTTCAGAACTGATGCAACCGGAGCTCTTTGGTGG  
TACAGGCTTCTCATCTCTTTCAGAACTGATGCAACAGAGCTCTTTGGTAG  
TACAGGCTTCTCATCTCTTTCAGAACTGATGCAATGGAGCTCTTTGGTAG  
TACAGGCTTCTCATCTCTTTCAGAAATTGATGCAATGGAGCTATTTGGTAG  
TACAGGCTTCTCATCTCTTTCAGAAATTGATGCAATGGAGCTATTTGGTAG  
\*\*\*\*\*

-----F3-----> <-----

MN369532.1\_Vaccinia  
NC\_003391\_Camelpox  
LR800247.1\_Variola  
NC\_003310\_Monkeypox\_Zaire  
NC\_063383\_Monkeypox\_USA2003

TGAGTTGAAGGAGTTCTCGGATTCACTTCCGTGGGACAATATCGACAATT  
CGAGTTGAAGGAGTTCTCGGATTCACTTCCGTGGGACAATATCGACAATT  
CGAGTTGAAGGAGTTCTCGGATTCACTTCCGTGGGACAATATCGACAATT  
CGAGTTGAAGGAGTTCTCGGATTCACTTCCGTGGGACAATATCGACAATT  
CGAGTTGAAGGAGTTCTCGAATTCACTTCCGTGGGACAATATCGACAATT  
\*\*\*\*\*

----F2-----><-----LF----- <-----F1c----

MN369532.1\_Vaccinia  
NC\_003391\_Camelpox  
LR800247.1\_Variola  
NC\_003310\_Monkeypox\_Zaire  
NC\_063383\_Monkeypox\_USA2003

GCGTGGAGATCATTAATGTTTCATCAGAAATGACTCCATGAAAACCGCC  
GCGTGGAGATCATTAATGTTTCATCAGAAATGACTCCATGAAAACCGCC  
GCGTGGAGATCATTAATGTTTCATCAGAAATGACTCCATGAAAACCGCC  
GCGTGGAGATCATTAATGTTTCATCAGAAATGACTCCATGAAAACCGCC  
GCGTGGAGATCATTAATGTTTCATCAGAAATGACTCCATGAAAACCGCC  
\*\*\*\*\*

----- <-----B1c-----

MN369532.1\_Vaccinia  
NC\_003391\_Camelpox  
LR800247.1\_Variola  
NC\_003310\_Monkeypox\_Zaire  
NC\_063383\_Monkeypox\_USA2003

GAAGAACTTCGTGCAATCATTGGACTTTGTACTCAATCAGCTATCGTCTC  
AAAGAACTTCGTGCAATCATTGGACTTTGTACTCAATCAGCTATCGTCTC  
AAAGAACTTTGTGCAATCATTGGACTTTGTACTCAATTAGCCATTGTCTC  
AAAGAACTTTGTGCAATAATTGGACTTTGTACTCAATCAGCTATTGTCCAC  
AAAGAACTTTGTGCAATAATTGGACTTTGTACTCAATCAGCTATTGTCCAC  
\*\*\*\*\*

--> <-----LB-----> <-----

MN369532.1\_Vaccinia  
NC\_003391\_Camelpox  
LR800247.1\_Variola  
NC\_003310\_Monkeypox\_Zaire  
NC\_063383\_Monkeypox\_USA2003

TGGAAGAGTCTTCAACGATAAGTATATCGACATACTACTTATGCTGCGAA  
TGGAAGAGTCTTCAACGATAAGTATATCGACATACTACTTATGCTGCGAA  
TGGAAGAGTCTTCAACGATAAGTATATCGACATACTACTTATGCTGCGAA  
TGGAAGAGTCTTCAATGATAAGTATATCGACATACTACTTATGCTGCGAA  
TGGAAGAGTCTTCAATGATAAGTATATCGACATACTACTTATGCTGCGAA  
\*\*\*\*\*

-----B2----- <-----B3-----

Figure 5

A

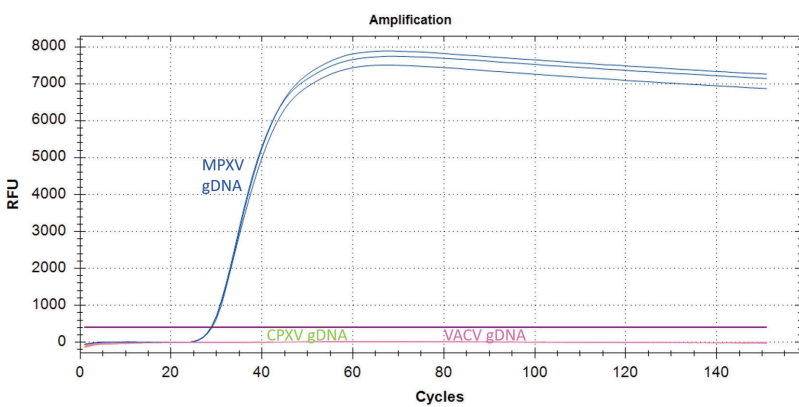

B

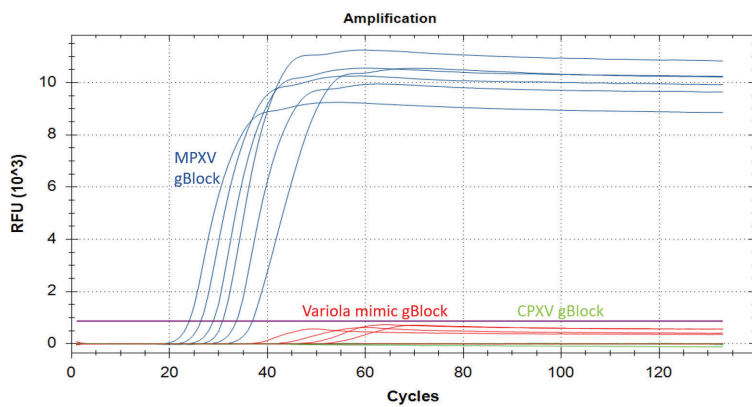

C

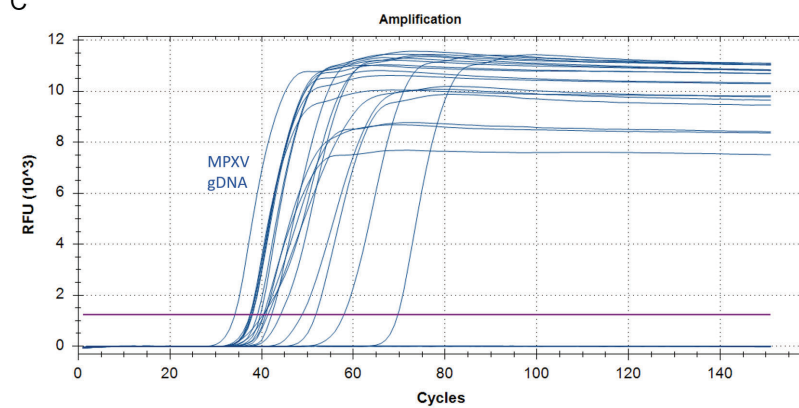

D

| Copies/ $\mu$ L | Cq   |      |      | Tt (min) |      |      |
|-----------------|------|------|------|----------|------|------|
|                 |      |      |      |          |      |      |
| 500             | 38.0 | 34.2 | 37.5 | 18.2     | 16.4 | 18.0 |
| 250             | 37.5 | 38.0 | 37.7 | 18.0     | 18.2 | 18.1 |
| 125             | 39.7 | 39.1 | 39.6 | 19.1     | 18.8 | 19.0 |
| 62.5            | 40.9 | 42.2 | 51.8 | 19.6     | 20.2 | 24.9 |
| 31.25           | N/A  | 69.7 | 48.8 | N/A      | 33.5 | 23.4 |
| 31.25           | 44.1 | 40.3 | 40.6 | 21.2     | 19.4 | 19.5 |
| 31.25           | 41.4 | 57.9 | 40.5 | 19.9     | 27.8 | 19.4 |
| H2O             | N/A  | N/A  | N/A  | N/A      | N/A  | N/A  |



Figure 6

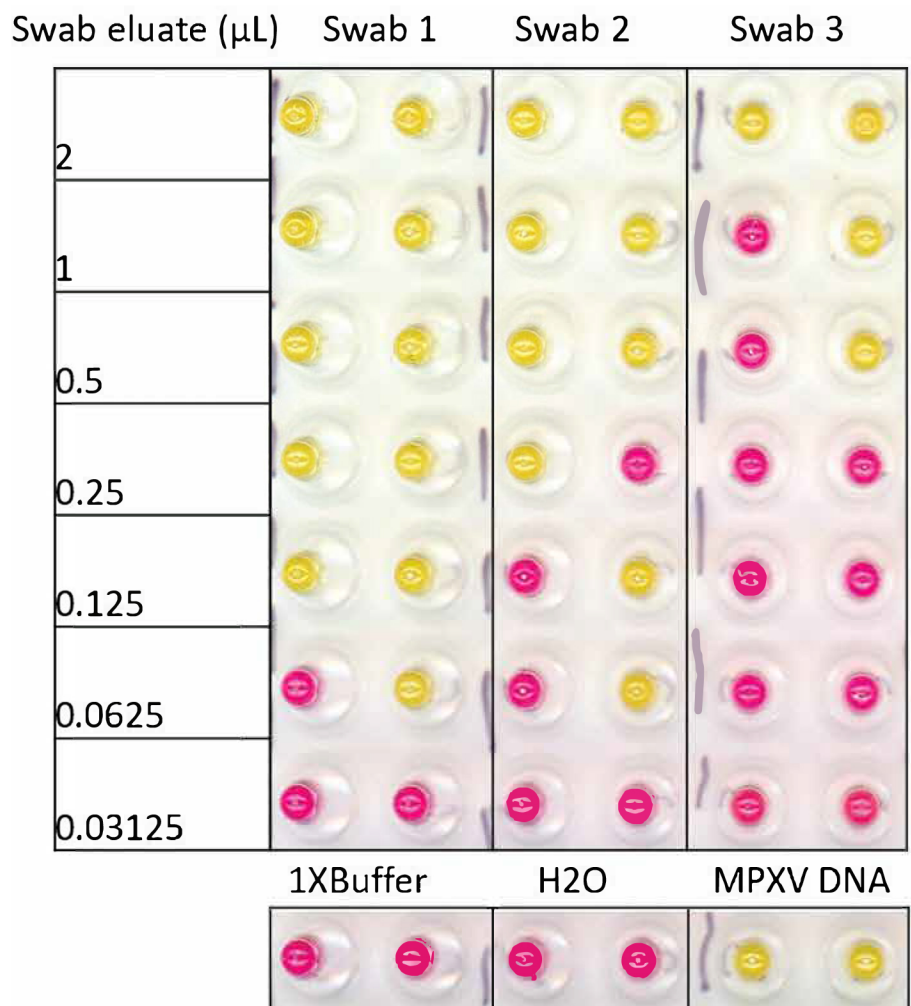

| Swab DNA | MPXV Gene 1 | MPXV Gene 2 | RNase P     |
|----------|-------------|-------------|-------------|
| Swab 1   | 26.19(0.23) | 26.32(0.03) | 32.04(0.28) |
| Swab 2   | 30.39(0.1)  | 31.36(0.39) | 25.55(0.1)  |
| Swab 3   | 33.14(0.22) | 33.14(0.39) | 26.6(0.48)  |
